# Supplementary material for: Nature of WO4 tetrahedra in blue light emitting CaWO4 probed through the EXAFS technique
Source: Royal Society of Chemistry journal article supplement (doi:10.1039/c3ra47619g), 2014-01-01
Supplement: c3ra47619g1.pdf [file c3ra47619g1.pdf]

### Supporting Information

## Nature of $\text{WO}_4$ tetrahedra in blue light emitting $\text{CaWO}_4$ Probed through EXAFS technique

S. Basu<sup>1</sup>, Boddu Sanyasi Naidu<sup>2</sup>, B. Viswanadh<sup>3</sup>, V. Sudarsan<sup>\*2</sup>, S.N. Jha<sup>1</sup>, D.  
Bhattacharyya<sup>1</sup> and R. K. Vatsa<sup>2</sup>

<sup>1</sup>Atomic & Molecular Physics Division, <sup>2</sup>Chemistry Division, <sup>3</sup>Materials Science  
Division,

Bhabha Atomic Research Centre, Mumbai – 400 085

Bhabha Atomic Research Centre, Trombay, Mumbai 400085, India.

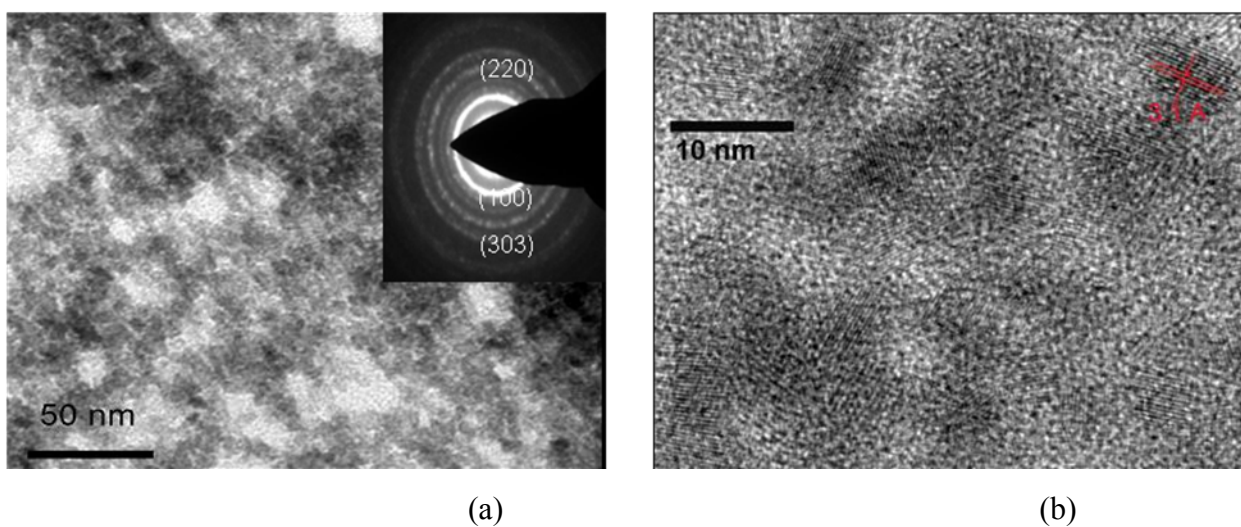

Figure 1. TEM image (a) and HRTEM image (b) of as prepared  $\text{CaWO}_4$  nanoparticles.  
The inset of Fig. 1(a) shows a representative SAED pattern from the sample.

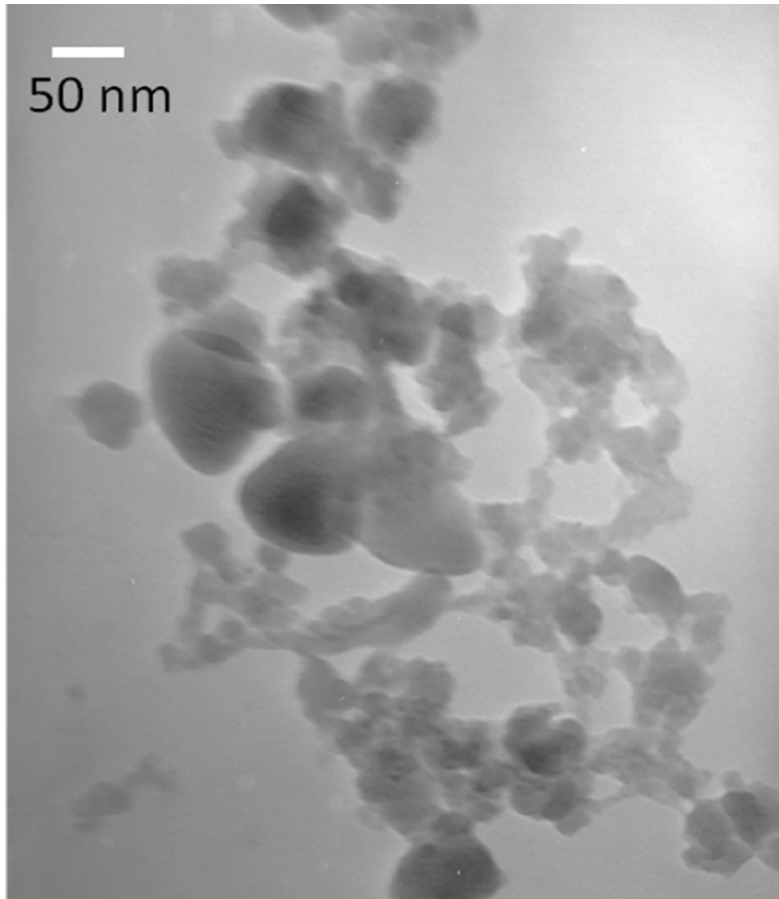

Figure 2. TEM image of CaWO<sub>4</sub> sample heated at 500°C

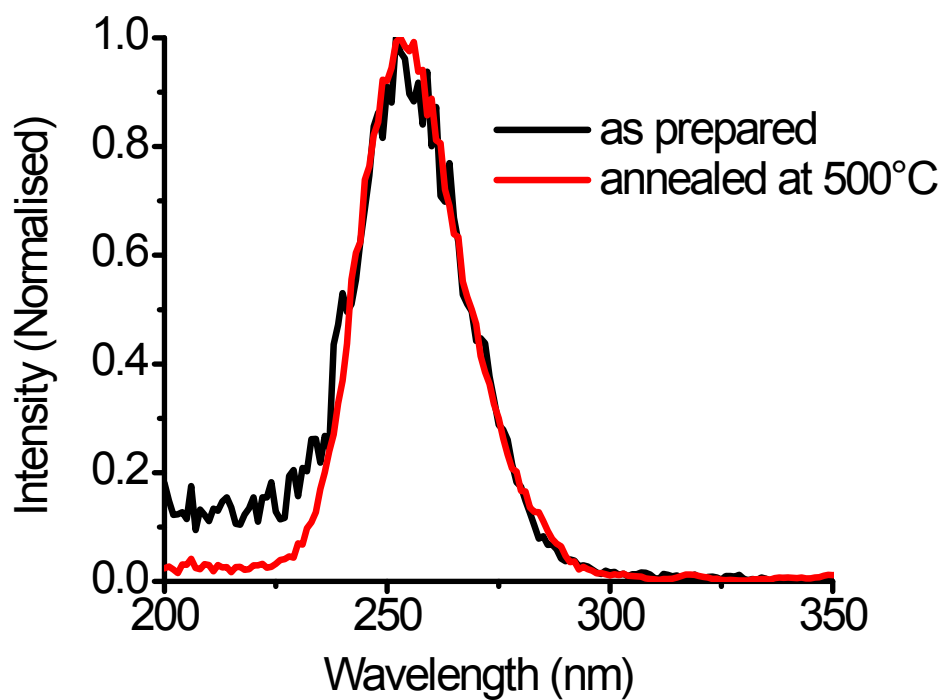

Figure 3. Excitation spectrum corresponding to blue emission from CaWO<sub>4</sub> sample: as prepared (black) and 500°C annealed (red).

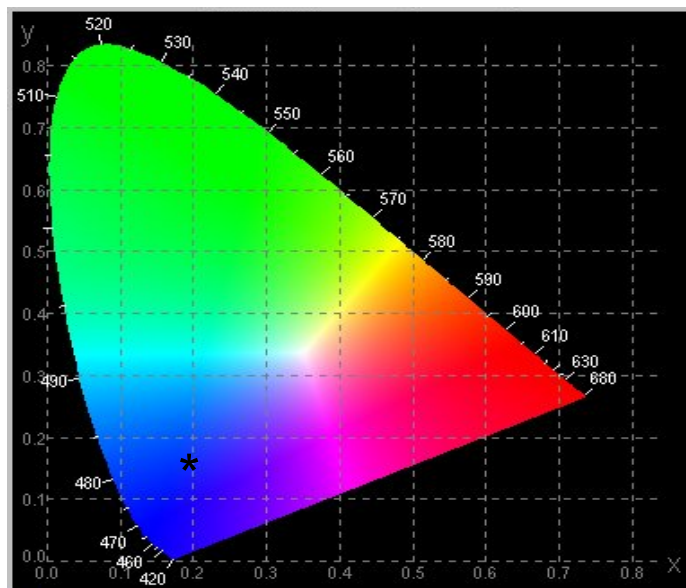

Figure 4. CIE plot showing the color coordinates calculated from the emission spectra corresponding to CaWO<sub>4</sub> nanoparticles. The peak marked \* corresponds to CIE coordinate (0.18, 0.14).
